# Supplementary material for: The relation between crystal structure and the occurrence of quantum-rotor-induced polarization
Source: Copernicus journal article supplement (doi:10.5194/mr-2-751-2021), 2021-10-22
Supplement: Supplementary file [file mr-2-751-2021-supplement.pdf]

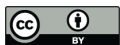

*Supplement of*

## **The relation between crystal structure and the occurrence of quantum-rotor-induced polarization**

**Corinna Dietrich et al.**

*Correspondence to:* Jörg Matysik ([joerg.matysik@uni-leipzig.de](mailto:joerg.matysik@uni-leipzig.de)) and Corinna Dietrich ([corinna.dietrich@gmx.de](mailto:corinna.dietrich@gmx.de))

The copyright of individual parts of the supplement might differ from the article licence.

## NMR spectra of $\gamma$ -picoline derivatives

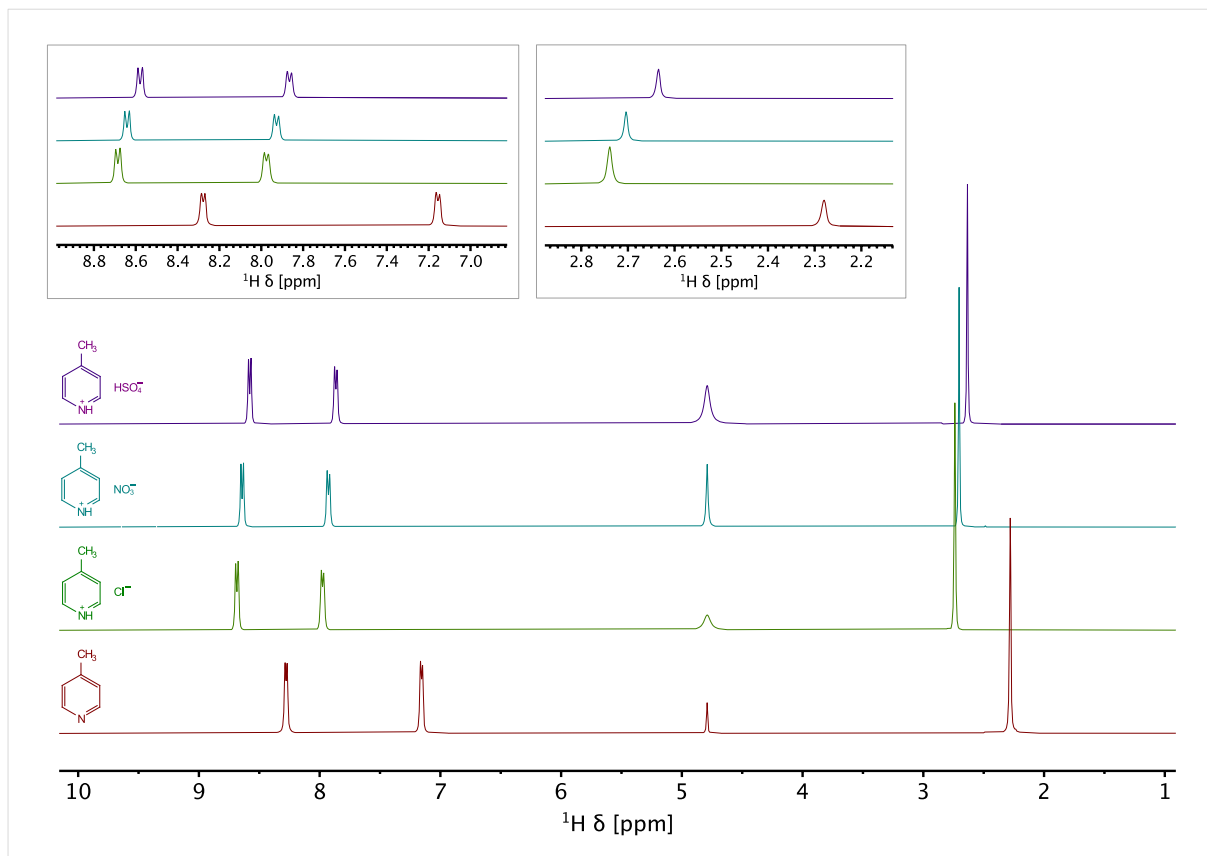

**Fig. S1:** Proton spectra of  $\gamma$ -picoline derivatives  $\gamma$ -picoline hydrochloride (**2**),  $\gamma$ -picoline nitrate (**3**) and  $\gamma$ -picoline hydrosulfate (**4**) in comparison to  $\gamma$ -picoline (**1**).

$\gamma$ -picoline:  $\delta$  ( $^1\text{H}$ , 300 MHz,  $\text{D}_2\text{O}$ ) [ppm] = 8.28 (N---CH); 7.16 (CH---CH---C<sub>q</sub>); 2.28 (CH<sub>3</sub>).

$\gamma$ -picoline hydrochloride:  $\delta$  ( $^1\text{H}$ , 300 MHz,  $\text{D}_2\text{O}$ ) [ppm] = 8.68 (N---CH); 7.98 (CH---CH---C<sub>q</sub>); 2.74 (CH<sub>3</sub>).

$\gamma$ -picoline nitrate:  $\delta$  ( $^1\text{H}$ , 300 MHz,  $\text{D}_2\text{O}$ ) [ppm] = 8.64 (N---CH); 7.93 (CH---CH---C<sub>q</sub>); 2.70 (CH<sub>3</sub>).

$\gamma$ -picoline hydrosulfate:  $\delta$  ( $^1\text{H}$ , 300 MHz,  $\text{D}_2\text{O}$ ) [ppm] = 8.58 (N---CH); 7.87 (CH---CH---C<sub>q</sub>); 2.63 (CH<sub>3</sub>).

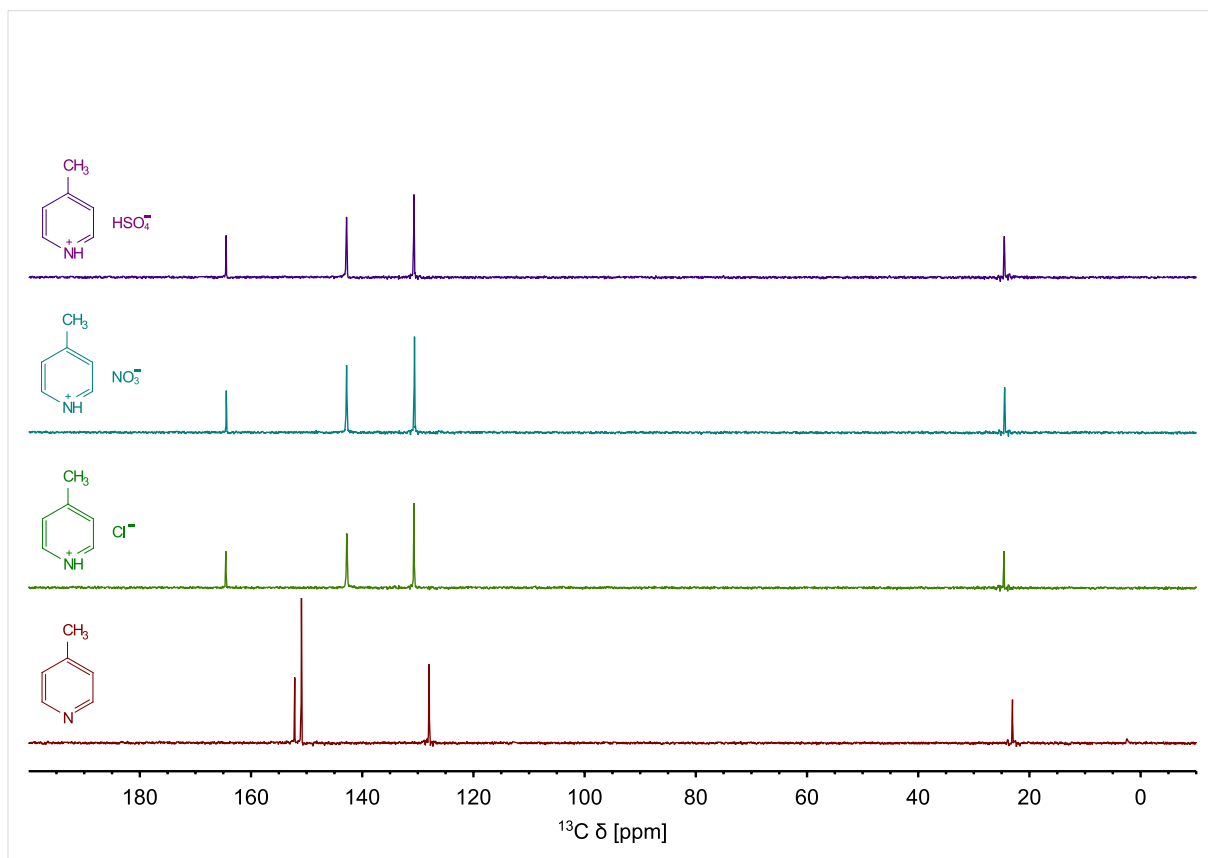

**Fig. S2:**  $^{13}\text{C}$  spectra of  $\gamma$ -picoline derivatives 2-4.

$\gamma$ -picoline:  $\delta$  ( $^{13}\text{C}$ , 300 MHz,  $\text{D}_2\text{O}$ ) [ppm] = 152.5 ( $\text{C---CH}_3$ ); 150.9 ( $\text{N---CH---CH}$ ); 128.0 ( $\text{CH---CH---C}_q$ ); 23.0 ( $\text{CH}_3$ ).

$\gamma$ -picoline hydrochloride:  $\delta$  ( $^{13}\text{C}$ , 300 MHz,  $\text{D}_2\text{O}$ ) [ppm] = 161.7 ( $\text{C---CH}_3$ ); 140.0 ( $\text{NH---CH---CH}$ ); 127.9 ( $\text{CH---CH---C}_q$ ); 21.9 ( $\text{CH}_3$ ).

$\gamma$ -picoline nitrate:  $\delta$  ( $^{13}\text{C}$ , 300 MHz,  $\text{D}_2\text{O}$ ) [ppm] = 164.4 ( $\text{C---CH}_3$ ); 142.8 ( $\text{NH---CH---CH}$ ); 130.6 ( $\text{CH---CH---C}_q$ ); 24.5 ( $\text{CH}_3$ ).

$\gamma$ -picoline hydrosulfate:  $\delta$  ( $^{13}\text{C}$ , 300 MHz,  $\text{D}_2\text{O}$ ) [ppm] = 164.5 ( $\text{C---CH}_3$ ); 142.8 ( $\text{NH---CH---CH}$ ); 130.7 ( $\text{CH---CH---C}_q$ ); 24.5 ( $\text{CH}_3$ ).

### Molecular structure of $\gamma$ -picoline hydrochloride

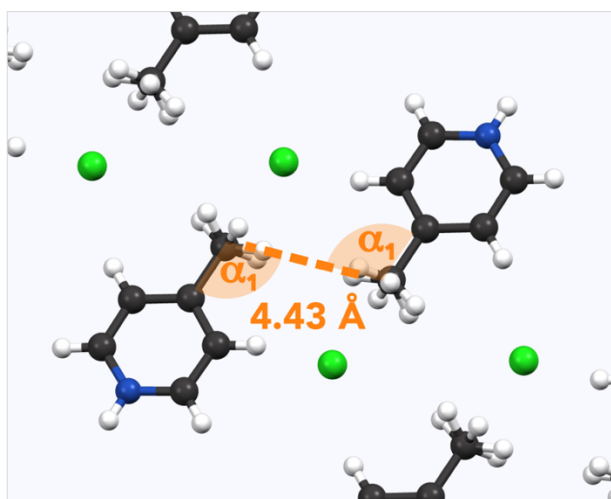

Fig. S3: Molecular structure of  $\gamma$ -picoline hydrochloride (2, DICCEX, [1]).

The angle  $\alpha_1$  is  $103^\circ$ . The molecular structures of 3 and 4 were not found in the Cambridge Crystallography Database.

### Molecular structure of aspirin

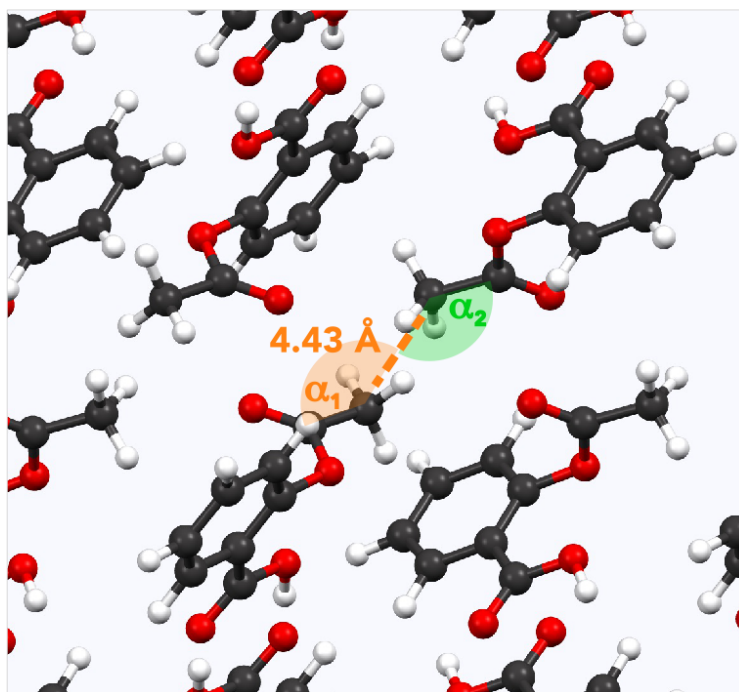

Fig. S4: Molecular structure of aspirin (13, ACSALA, [2]).

The angles are  $\alpha_1 = 147^\circ$  and  $\alpha_2 = 100^\circ$ .

### Molecular structure of *m*-cresol

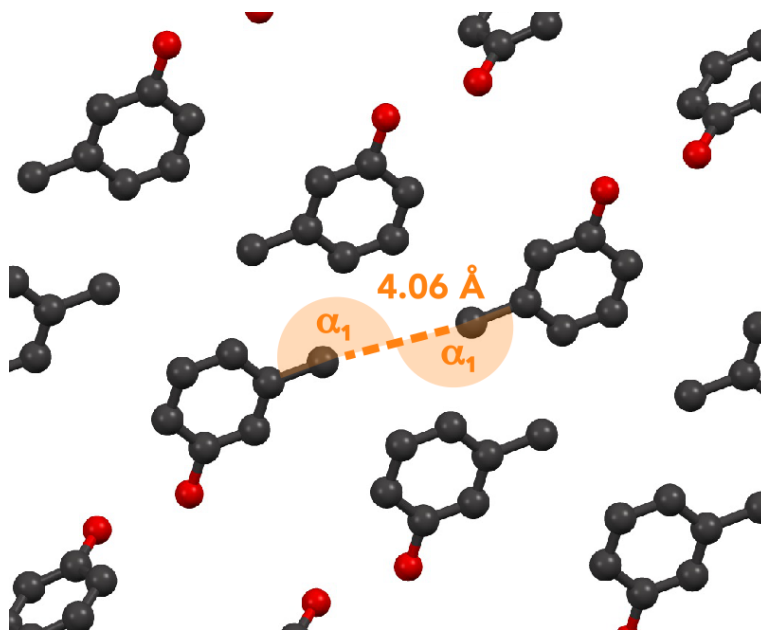

Fig. S5: Molecular structure of *m*-cresol (24, MCRSOL, [3]).

The angle  $\alpha_1$  is 174°.

### Molecular structure of 1,3-dibromo-2,4,6-trimethylbenzene

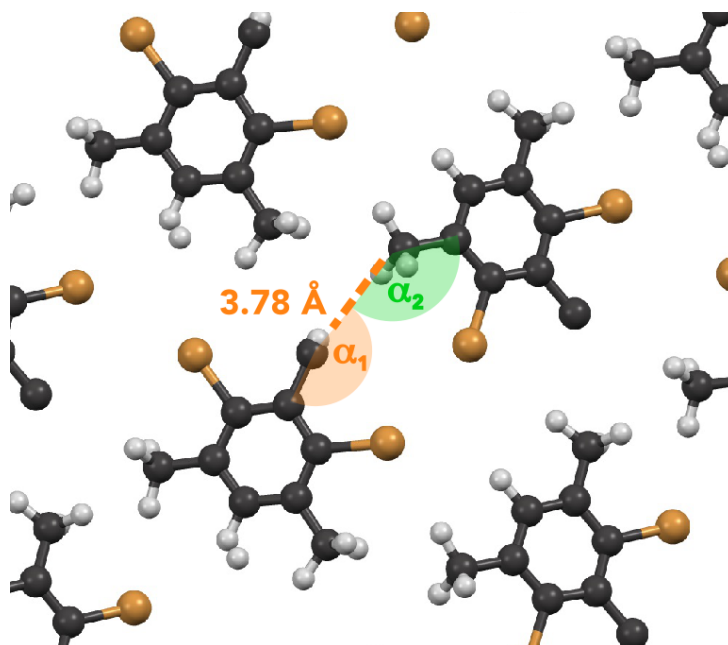

Fig. S6: Molecular structure of 1,3-dibromo-2,4,6-trimethylbenzene (25, EJEROA, [4]).

The angles are  $\alpha_1 = 158^\circ$  and  $\alpha_2 = 142^\circ$ .

## Sample preparation for measurement under air exclusion

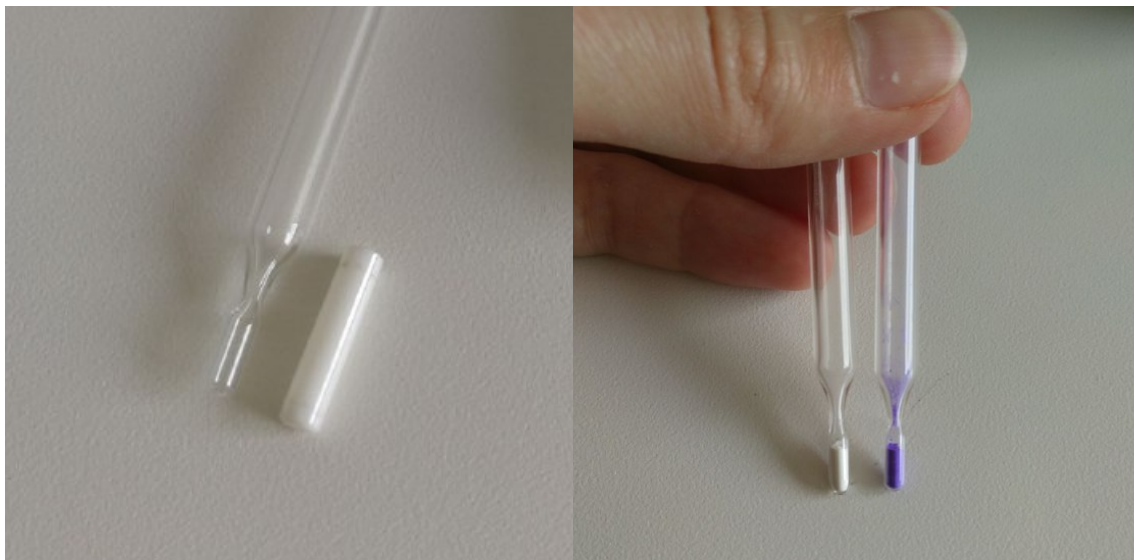

**Fig. S7:** Glass tubes for MAS-NMR measurement under air exclusion. Left: empty glass tube next to 4 mm rotor. Right: glass tubes filled with powder samples (before vacuum and sealing), ZIF-8 (white sample), ZIF-67 (purple sample).

## MAS-NMR spectra of ZIFs

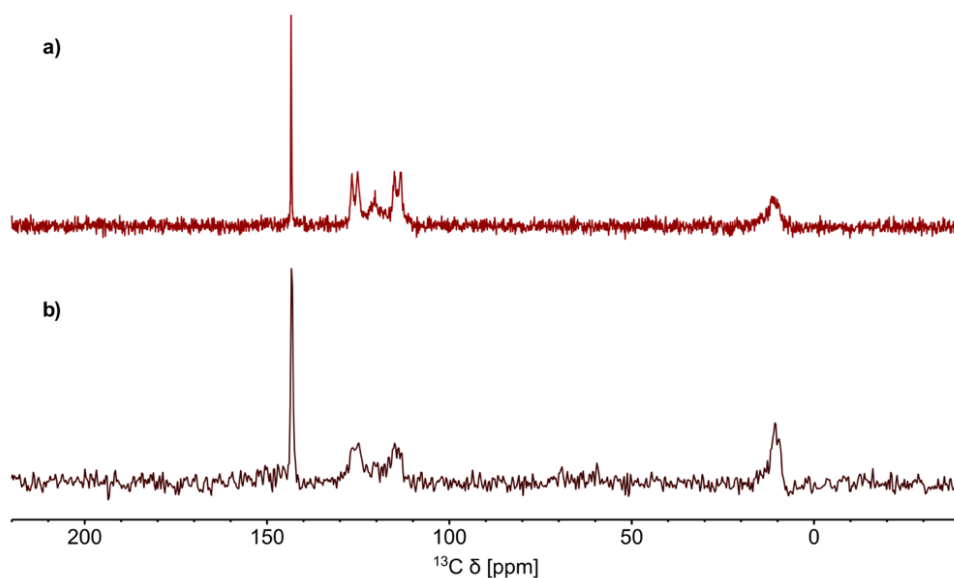

**Fig. S8:** a) Spectrum of ZIF-8 measured in glass tube inside rotor. Hahn echo pulse sequence, non-decoupled, 8 kHz MAS frequency, 10.000 scans.  
b) Spectrum of ZIF-67 measured with regular packing method. Hahn echo pulse sequence, non-decoupled, 8 kHz MAS frequency, 1.000 scans.

## XRD spectra

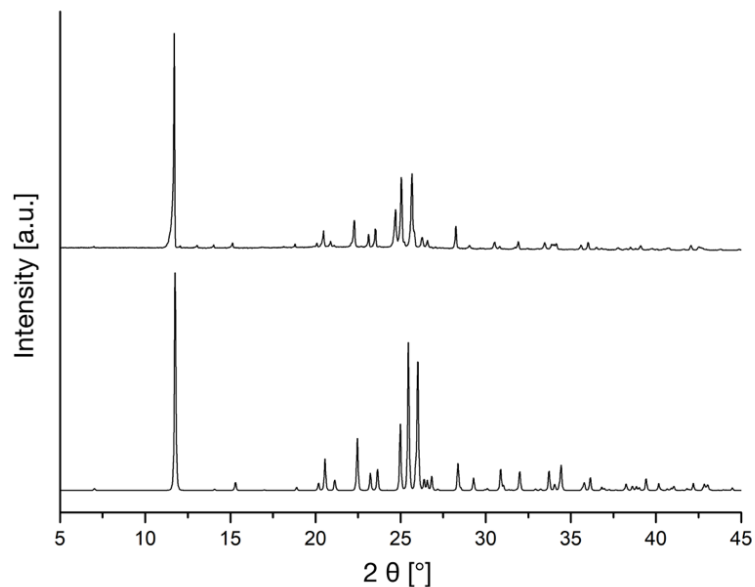

**Fig. S9:** XRD spectra of 2,5-dimethyl-1,3-dinitrobenzene (**8**, AYOYAP). Top: experimental data, bottom: simulated spectrum from crystal structure data (Johnston and Crather, 2011).

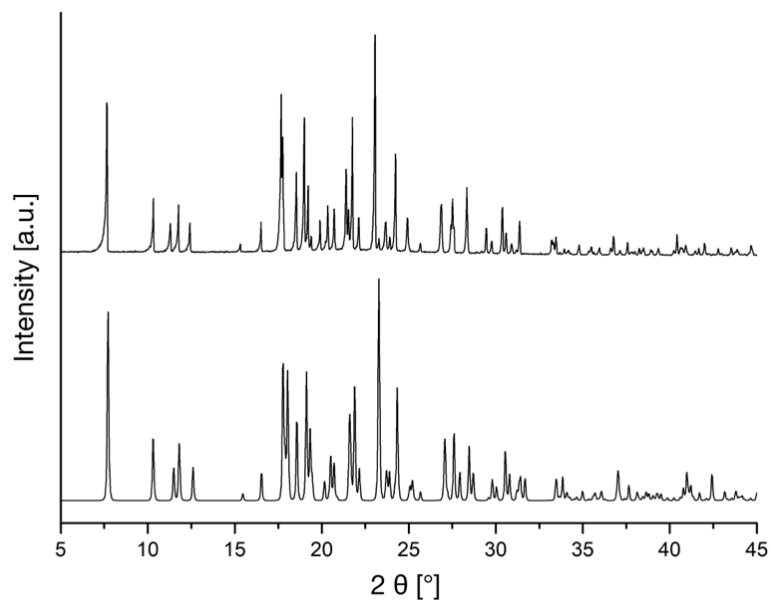

**Fig. S10:** XRD spectra of *N'*-(3,4-difluorobenzylidene)-4-methylbenzenesulfonylhydrazide (**12**, NUQDUA). Top: experimental data, bottom: simulated spectrum from crystal structure data (Wang and Yan, 2015).

## Tunnel frequency fit

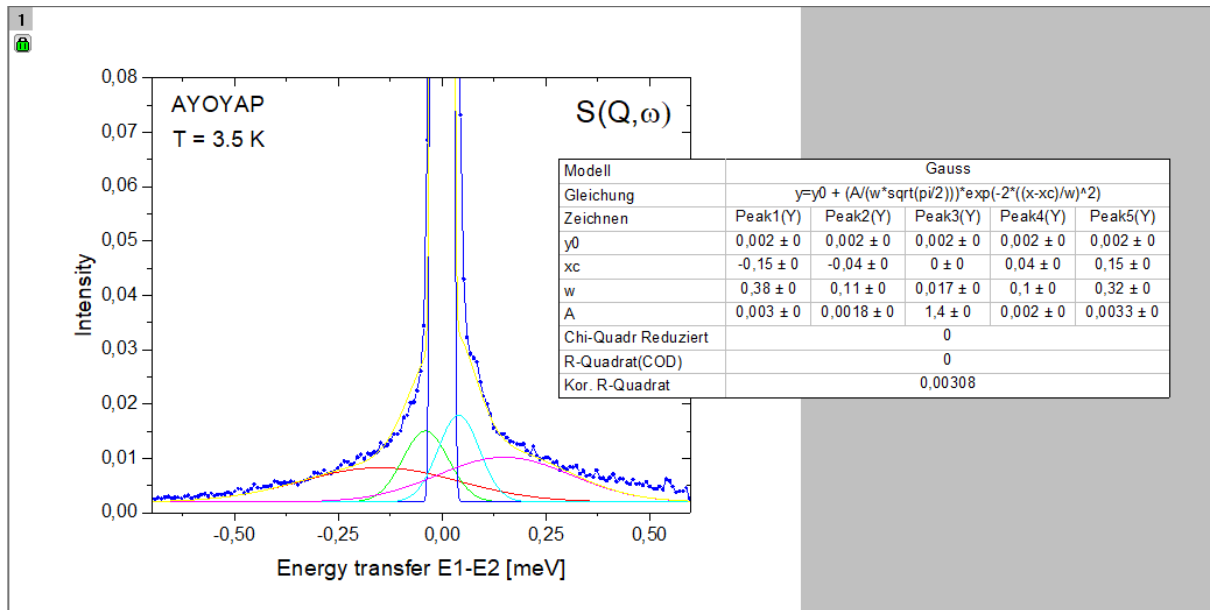

Fig. S11: Origin Fit for 2,5-dimethyl-1,3-dinitrobenzene (**8**, AYOYAP).

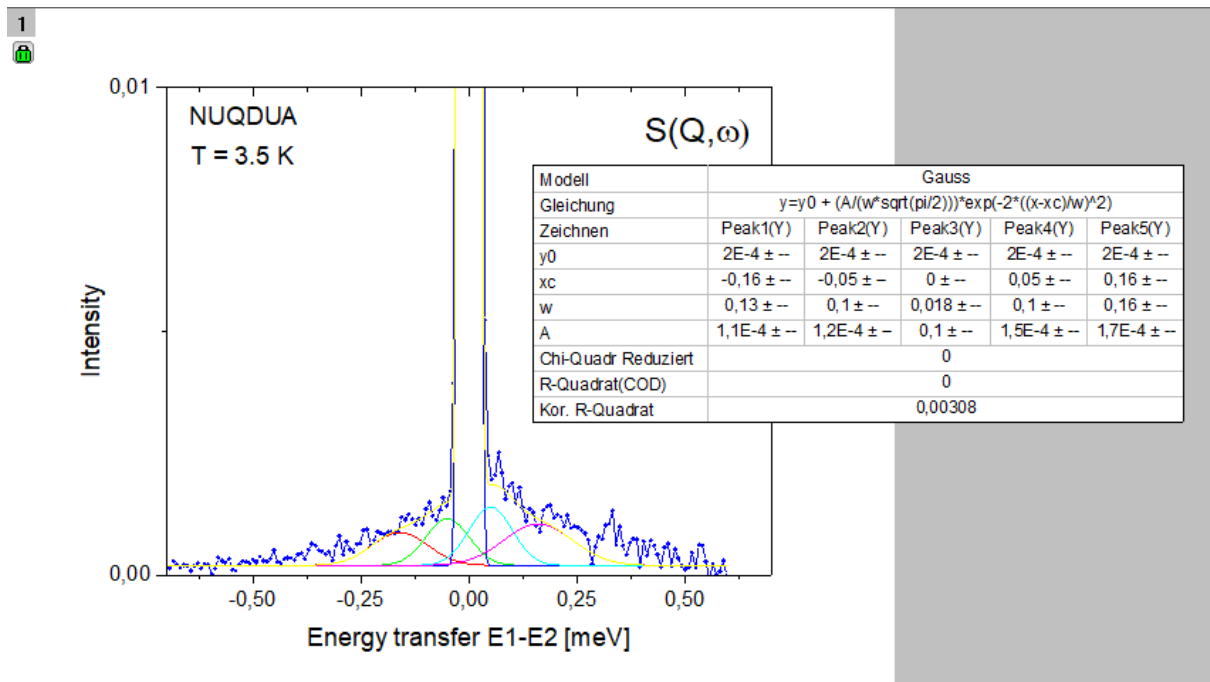

Fig. S12: Origin Fit for *N*-(3,4-difluorobenzylidene)-4-methylbenzenesulfonohydrazide (**12**, NUQDUA).



## Literature of Supplementary

- [1] Faber, A., Lemke, A., Spangenberg, B. & Bolte, M. Three hydrohalogenides of organic nitrogen bases. *Acta Crystallogr. Sect. C Cryst. Struct. Commun.* **55**, IUC9900156 (1999).
- [2] Arputharaj, D. S., Hathwar, V. R., Guru Row, T. N. & Kumaradhas, P. Topological Electron Density Analysis and Electrostatic Properties of Aspirin: An Experimental and Theoretical Study. *Cryst. Growth Des.* **12**, 4357–4366 (2012).
- [3] Bois, C. Structure du m -crésol. *Acta Crystallogr. Sect. B Struct. Crystallogr. Cryst. Chem.* **29**, 1011–1017 (1973).
- [4] Hernandez, O., Cousson, A., Plazanet, M., Nierlich, M. & Meinel, J. The low-temperature phase of 1,3-dibromo-2,4,6-trimethylbenzene: a single-crystal neutron diffraction study at 120 and 14 K. *Acta Crystallogr. Sect. C Cryst. Struct. Commun.* **59**, o445–o450 (2003).
